# Supplementary material for: Age-dependent increase in antibodies that inhibit Plasmodium falciparum adhesion to a subset of endothelial receptors
Source: PubMed Central journal article supplement (PMC6458601; doi:10.1186/s12936-019-2764-4), 2019-04-11

**Figure S1:** Binding inhibition levels stratified by age. Box plot indicates the median (horizontal line) and interquartile range (box), the whiskers indicate the 5th and 95th percentiles. Number of samples and statistical analysis are shown in Tables 1 and 2.

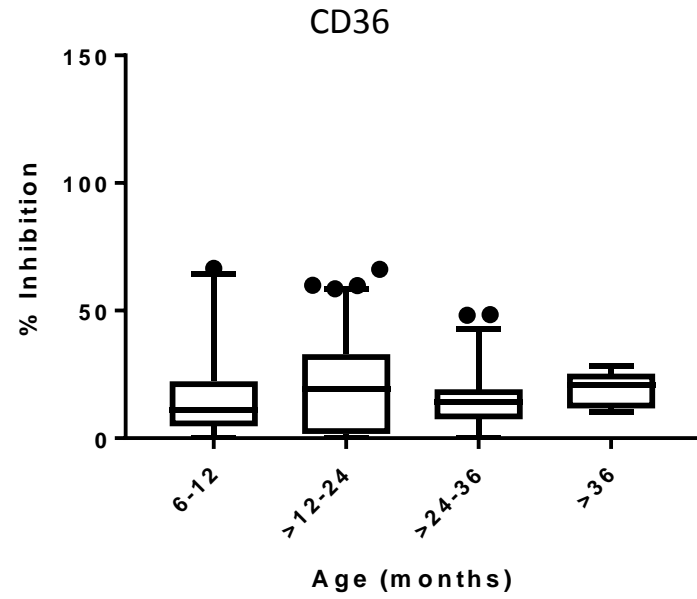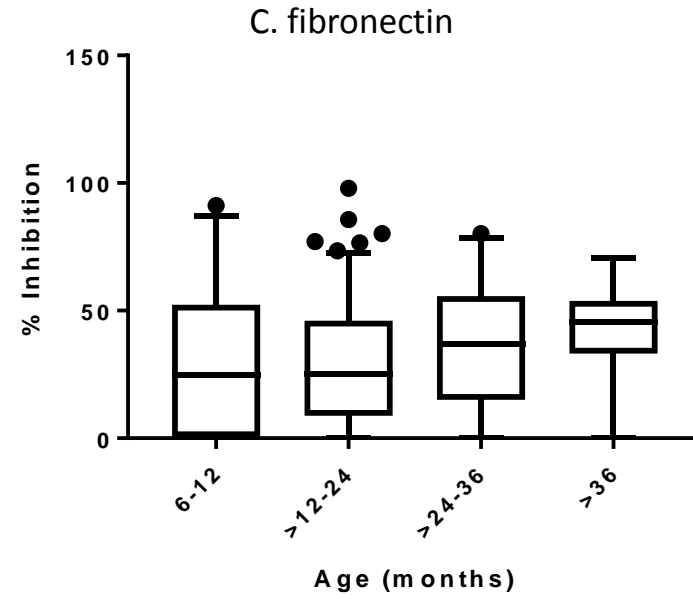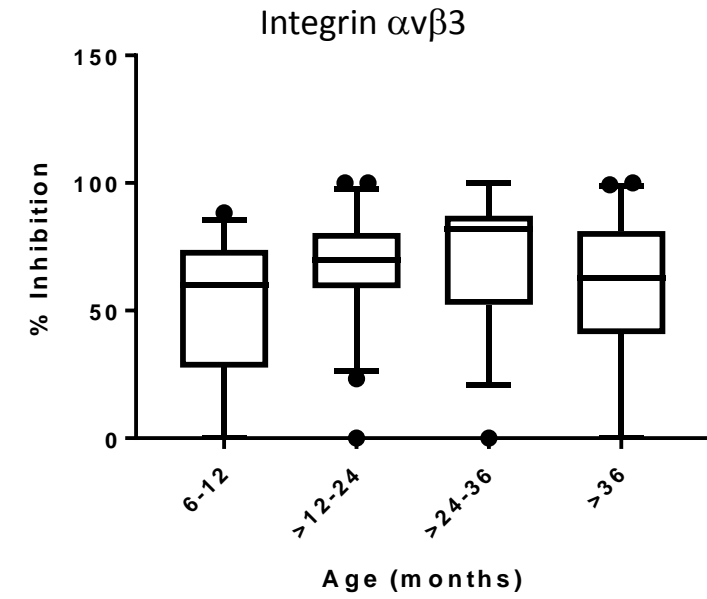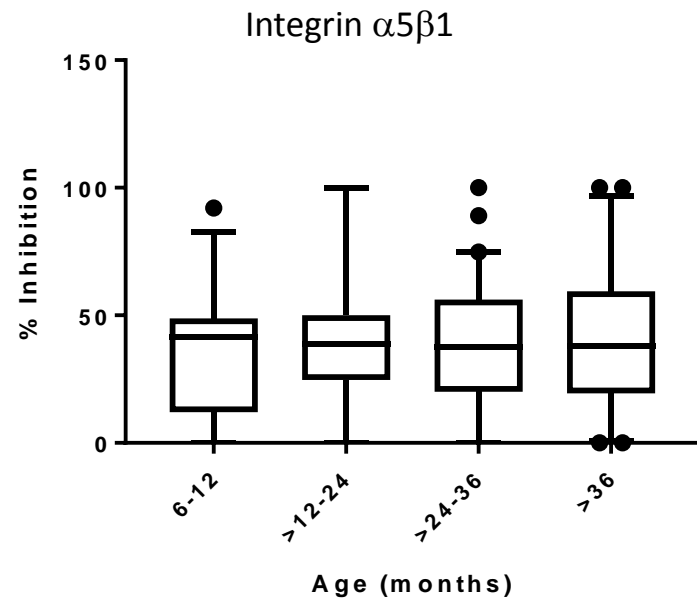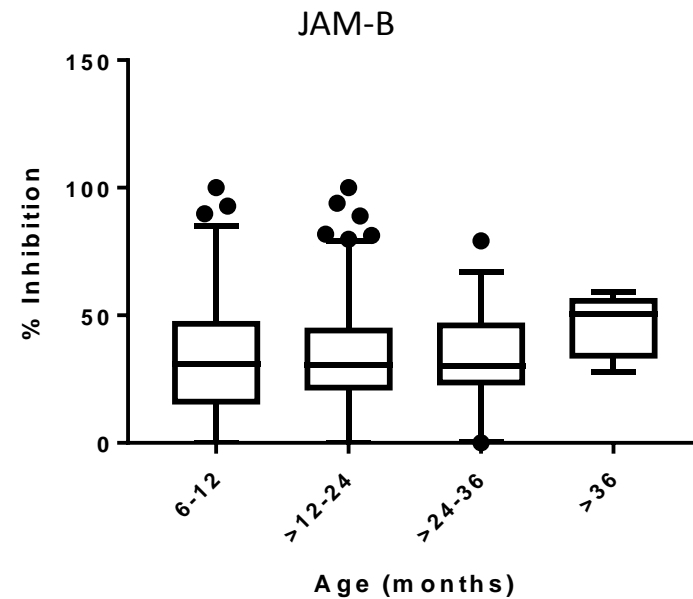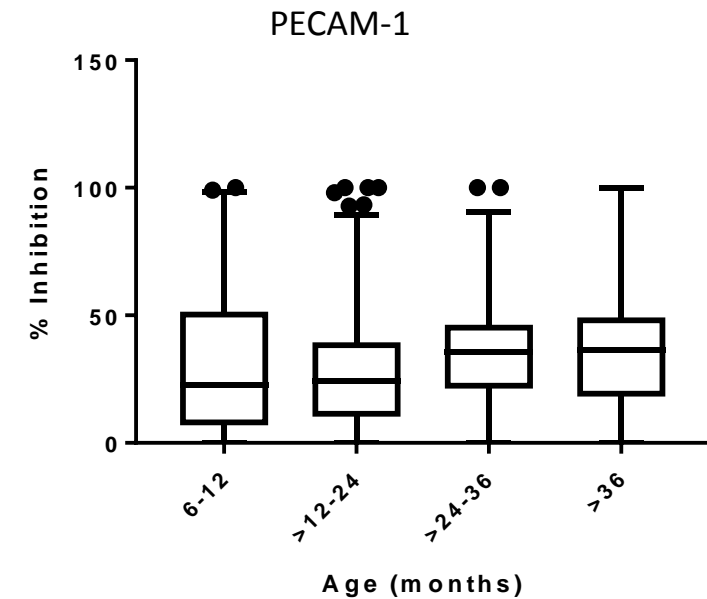

# P-selectin

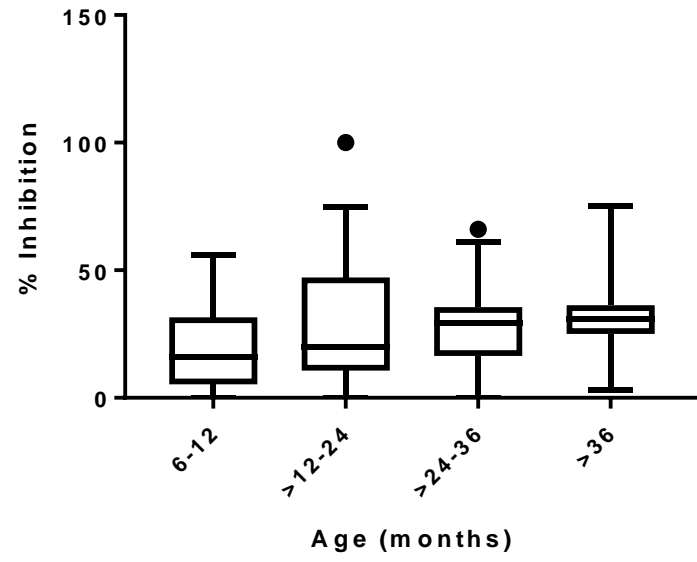

Supplement: 12936_2019_2764_MOESM2_ESM.pdf [file 12936_2019_2764_MOESM2_ESM.pdf]
